# Supplementary material
Source: MDPI journal article supplement (https://www.mdpi.com/1424-8247/16/9/1277)
Supplement: s1 [file s1]

**Supplementary Table S1:** Associations between CYP2C19 metaboliser phenotype and antidepressant switching.

| <b>Citalopram</b>            |                  |          |                     |          |                  |          |                     |          |                  |          |                     |          |
|------------------------------|------------------|----------|---------------------|----------|------------------|----------|---------------------|----------|------------------|----------|---------------------|----------|
| <b>Metaboliser phenotype</b> | <b>30 days</b>   |          |                     |          | <b>60 days</b>   |          |                     |          | <b>90 days</b>   |          |                     |          |
|                              | Switch frequency | % switch | OR (95% CI)         | <i>P</i> | Switch frequency | % switch | OR (95% CI)         | <i>P</i> | Switch frequency | % switch | OR (95% CI)         | <i>P</i> |
| PM                           | 17/478           | 3.6%     | 0.705 (0.428-1.160) | 0.169    | 28/489           | 5.7%     | 0.917 (0.617-1.363) | 0.669    | 46/506           | 9.1%     | 0.956 (0.698-1.310) | 0.781    |
| IM                           | 233/4724         | 4.9%     | 0.981 (0.827-1.162) | 0.822    | 287/4778         | 6.0%     | 0.964 (0.827-1.124) | 0.643    | 488/4960         | 9.8%     | 1.04 (0.920-1.174)  | 0.533    |
| NM                           | 362/7197         | 5.0%     | -                   | -        | 455/7290         | 6.2%     | -                   | -        | 716/7535         | 9.5%     | -                   | -        |
| FM                           | 300/5842         | 5.1%     | 1.019 (0.870-1.194) | 0.812    | 367/5909         | 6.2%     | 0.991 (0.859-1.144) | 0.904    | 582/6102         | 9.5%     | 1.005 (0.895-1.129) | 0.930    |
| <b>Escitalopram</b>          |                  |          |                     |          |                  |          |                     |          |                  |          |                     |          |
| <b>Metaboliser phenotype</b> | <b>30 days</b>   |          |                     |          | <b>60 days</b>   |          |                     |          | <b>90 days</b>   |          |                     |          |
|                              | Switch frequency | % switch | OR (95% CI)         | <i>P</i> | Switch frequency | % switch | OR (95% CI)         | <i>P</i> | Switch frequency | % switch | OR (95% CI)         | <i>P</i> |
| PM                           | 8/54             | 14.8%    | 2.244 (0.917-5.491) | 0.077    | 10/56            | 17.9%    | 2.311 (1.034-5.163) | 0.041    | 13/59            | 22%      | 1.842 (0.920-3.69)  | 0.085    |
| IM                           | 36/567           | 6.3%     | 1.027 (0.650-1.620) | 0.910    | 57/588           | 9.7%     | 1.347 (0.913-1.986) | 0.133    | 86/613           | 14%      | 1.317 (0.955-1.817) | 0.093    |
| NM                           | 58/866           | 6.7%     | -                   | -        | 71/879           | 8.1%     | -                   | -        | 106/909          | 11.7%    | -                   | -        |
| FM                           | 30/713           | 4.2%     | 0.601 (0.374-0.966) | 0.036    | 42/725           | 5.8%     | 0.708 (0.468-1.073) | 0.103    | 70/749           | 9.3%     | 0.797 (0.570-1.112) | 0.182    |
| <b>Sertraline</b>            |                  |          |                     |          |                  |          |                     |          |                  |          |                     |          |
| <b>Metaboliser phenotype</b> | <b>30 days</b>   |          |                     |          | <b>60 days</b>   |          |                     |          | <b>90 days</b>   |          |                     |          |
|                              | Switch frequency | % switch | OR (95% CI)         | <i>P</i> | Switch frequency | % switch | OR (95% CI)         | <i>P</i> | Switch frequency | % switch | OR (95% CI)         | <i>P</i> |
| PM                           | 24/238           | 10.1%    | 1.363 (0.872-2.131) | 0.174    | 29/243           | 11.9%    | 1.331 (0.883-2.007) | 0.172    | 41/253           | 16.2%    | 1.277 (0.898-1.817) | 0.173    |
| IM                           | 185/2390         | 7.7%     | 1.018 (0.837-1.239) | 0.856    | 229/2434         | 9.4%     | 1.031 (0.862-1.232) | 0.740    | 338/2525         | 13.4%    | 1.01 (0.870-1.173)  | 0.897    |
| NM                           | 279/3633         | 7.7%     | -                   | -        | 340/3694         | 9.2%     | -                   | -        | 513/3841         | 13.4%    | -                   | -        |
| FM                           | 237/2805         | 8.4%     | 1.104 (0.919-1.326) | 0.291    | 302/2870         | 10.5%    | 1.149 (0.974-1.356) | 0.100    | 441/2995         | 14.7%    | 1.12 (0.975-1.288)  | 0.109    |

**Supplementary Table S2:** Associations between CYP2C19 metaboliser phenotype and antidepressant discontinuation.

| <b>Citalopram</b>            |                                                  |               |                     |          |                                                        |               |                     |          |
|------------------------------|--------------------------------------------------|---------------|---------------------|----------|--------------------------------------------------------|---------------|---------------------|----------|
| <b>Metaboliser phenotype</b> | <b>Discontinuation after single prescription</b> |               |                     |          | <b>Discontinuation after brief prescription period</b> |               |                     |          |
|                              | Discontinue frequency                            | % discontinue | OR (95% CI)         | <i>P</i> | Discontinue frequency                                  | % discontinue | OR (95% CI)         | <i>P</i> |
| PM                           | 75/536                                           | 14.0%         | 1.267 (0.980-1.637) | 0.071    | 103/556                                                | 18.5%         | 1.366 (1.090-1.712) | 0.007    |
| IM                           | 589/5080                                         | 11.6%         | 1.028 (0.920-1.150) | 0.623    | 790/5241                                               | 15.1%         | 1.058 (0.959-1.169) | 0.261    |
| NM                           | 880/7715                                         | 11.4%         | -                   | -        | 1145/7933                                              | 14.4%         | -                   | -        |
| FM                           | 681/6223                                         | 10.9%         | 0.958 (0.861-1.067) | 0.437    | 907/6411                                               | 14.1%         | 0.982 (0.893-1.080) | 0.704    |
| <b>Esitalopram</b>           |                                                  |               |                     |          |                                                        |               |                     |          |
| <b>Metaboliser phenotype</b> | <b>Discontinuation after single prescription</b> |               |                     |          | <b>Discontinuation after brief prescription period</b> |               |                     |          |
|                              | Discontinue frequency                            | % discontinue | OR (95% CI)         | <i>P</i> | Discontinue frequency                                  | % discontinue | OR (95% CI)         | <i>P</i> |
| PM                           | 3/49                                             | 6.1%          | 0.613 (0.178-2.105) | 0.437    | 6/51                                                   | 11.8%         | 0.924 (0.367-2.324) | 0.866    |
| IM                           | 34/565                                           | 6.0%          | 0.676 (0.437-1.044) | 0.078    | 52/578                                                 | 9.0%          | 0.772 (0.536-1.112) | 0.164    |
| NM                           | 79/887                                           | 8.9%          | -                   | -        | 106/910                                                | 11.6%         | -                   | -        |
| FM                           | 54/737                                           | 7.3%          | 0.806 (0.552-1.178) | 0.266    | 77/758                                                 | 10.2%         | 0.847 (0.611-1.173) | 0.317    |
| <b>Sertraline</b>            |                                                  |               |                     |          |                                                        |               |                     |          |
| <b>Metaboliser phenotype</b> | <b>Discontinuation after single prescription</b> |               |                     |          | <b>Discontinuation after brief prescription period</b> |               |                     |          |
|                              | Discontinue frequency                            | % discontinue | OR (95% CI)         | <i>P</i> | Discontinue frequency                                  | % discontinue | OR (95% CI)         | <i>P</i> |
| PM                           | 37/251                                           | 14.7%         | 1.332 (0.919-1.930) | 0.130    | 47/260                                                 | 18.1%         | 1.210 (0.866-1.692) | 0.264    |
| IM                           | 296/2501                                         | 11.8%         | 1.021 (0.870-1.197) | 0.802    | 382/2577                                               | 14.8%         | 0.954 (0.828-1.098) | 0.509    |
| NM                           | 443/3797                                         | 11.7%         | -                   | -        | 612/3941                                               | 15.5%         | -                   | -        |
| FM                           | 347/2915                                         | 11.9%         | 1.025 (0.880-1.193) | 0.755    | 461/3010                                               | 15.3%         | 0.984 (0.861-1.125) | 0.816    |

**Supplementary Table S3:** Associations between CYP2C19 metaboliser phenotype and side effects following first antidepressant prescription.

| <b>Citalopram</b>            |                                    |                |                     |          |                                    |                |                     |          |
|------------------------------|------------------------------------|----------------|---------------------|----------|------------------------------------|----------------|---------------------|----------|
| <b>Metaboliser phenotype</b> | <b>Side effects within 30 days</b> |                |                     |          | <b>Side effects within 60 days</b> |                |                     |          |
|                              | Side effects frequency             | % side effects | OR (95% CI)         | <i>P</i> | Side effects frequency             | % side effects | OR (95% CI)         | <i>P</i> |
| PM                           | 36/675                             | 5.3%           | 0.936 (0.661-1.326) | 0.710    | 54/675                             | 8.0%           | 0.892 (0.669-1.191) | 0.439    |
| IM                           | 354/6455                           | 5.5%           | 0.969 (0.844-1.113) | 0.658    | 548/6455                           | 8.5%           | 0.963 (0.860-1.078) | 0.511    |
| NM                           | 547/9708                           | 5.6%           | -                   | -        | 851/9708                           | 8.8%           | -                   | -        |
| FM                           | 408/7833                           | 5.2%           | 0.917 (0.803-1.046) | 0.198    | 620/7833                           | 7.9%           | 0.892 (0.801-0.995) | 0.040    |
| <b>Esitalopram</b>           |                                    |                |                     |          |                                    |                |                     |          |
| <b>Metaboliser phenotype</b> | <b>Side effects within 30 days</b> |                |                     |          | <b>Side effects within 60 days</b> |                |                     |          |
|                              | Discontinue frequency              | % discontinue  | OR (95% CI)         | <i>P</i> | Discontinue frequency              | % discontinue  | OR (95% CI)         | <i>P</i> |
| PM                           | 9/75                               | 12.0%          | 3.179 (1.420-7.121) | 0.005    | 10/75                              | 13.3%          | 1.748 (0.836-3.656) | 0.138    |
| IM                           | 46/791                             | 5.8%           | 1.241 (0.826-1.865) | 0.298    | 73/791                             | 9.2%           | 1.082 (0.783-1.497) | 0.632    |
| NM                           | 62/1195                            | 5.2%           | -                   | -        | 107/1195                           | 9.0%           | -                   | -        |
| FM                           | 46/946                             | 4.9%           | 0.967 (0.645-1.449) | 0.870    | 74/946                             | 7.8%           | 0.853 (0.619-1.175) | 0.330    |
| <b>Sertraline</b>            |                                    |                |                     |          |                                    |                |                     |          |
| <b>Metaboliser phenotype</b> | <b>Side effects within 30 days</b> |                |                     |          | <b>Side effects within 60 days</b> |                |                     |          |
|                              | Discontinue frequency              | % discontinue  | OR (95% CI)         | <i>P</i> | Discontinue frequency              | % discontinue  | OR (95% CI)         | <i>P</i> |
| PM                           | 17/347                             | 4.9%           | 0.970 (0.584-1.613) | 0.908    | 29/347                             | 8.4%           | 0.981 (0.660-1.459) | 0.924    |
| IM                           | 177/3297                           | 5.4%           | 1.032 (0.846-1.259) | 0.754    | 292/3297                           | 8.9%           | 1.013 (0.866-1.185) | 0.873    |
| NM                           | 258/4945                           | 5.2%           | -                   | -        | 435/4945                           | 8.8%           | -                   | -        |
| FM                           | 190/3910                           | 4.9%           | 0.932 (0.768-1.132) | 0.480    | 319/3910                           | 8.2%           | 0.920 (0.790-1.072) | 0.285    |

**Supplementary Table S4:** Associations between CYP2C19 metaboliser phenotype and antidepressant switching in a subset of individuals that exhibited a broad depression phenotype.

| <b>Citalopram</b>            |                  |          |                     |          |                  |          |                     |          |                  |          |                     |          |
|------------------------------|------------------|----------|---------------------|----------|------------------|----------|---------------------|----------|------------------|----------|---------------------|----------|
| <b>Metaboliser phenotype</b> | <b>30 days</b>   |          |                     |          | <b>60 days</b>   |          |                     |          | <b>90 days</b>   |          |                     |          |
|                              | Switch frequency | % switch | OR (95% CI)         | <i>P</i> | Switch frequency | % switch | OR (95% CI)         | <i>P</i> | Switch frequency | % switch | OR (95% CI)         | <i>P</i> |
| PM                           | 13/369           | 3.5%     | 0.699 (0.396-1.236) | 0.218    | 19/375           | 5.1%     | 0.805 (0.500-1.296) | 0.372    | 36/391           | 9.2%     | 0.954 (0.668-1.361) | 0.794    |
| IM                           | 190/3848         | 4.9%     | 1.001 (0.829-1.209) | 0.990    | 232/3890         | 6.0%     | 0.960 (0.810-1.138) | 0.638    | 386/4031         | 9.6%     | 1.001 (0.874-1.146) | 0.992    |
| NM                           | 294/5927         | 5.0%     | -                   | -        | 376/6009         | 6.3%     | -                   | -        | 595/6216         | 9.6%     | -                   | -        |
| FM                           | 252/4787         | 5.3%     | 1.069 (0.898-1.273) | 0.451    | 310/4845         | 6.4%     | 1.024 (0.875-1.198) | 0.766    | 484/5000         | 9.7%     | 1.014 (0.893-1.152) | 0.825    |
| <b>Escitalopram</b>          |                  |          |                     |          |                  |          |                     |          |                  |          |                     |          |
| <b>Metaboliser phenotype</b> | <b>30 days</b>   |          |                     |          | <b>60 days</b>   |          |                     |          | <b>90 days</b>   |          |                     |          |
|                              | Switch frequency | % switch | OR (95% CI)         | <i>P</i> | Switch frequency | % switch | OR (95% CI)         | <i>P</i> | Switch frequency | % switch | OR (95% CI)         | <i>P</i> |
| PM                           | 7/50             | 14.0%    | 2.208 (0.850-5.734) | 0.104    | 9/52             | 17.3%    | 2.371 (1.017-5.530) | 0.046    | 12/55            | 21.8%    | 1.959 (0.945-4.061) | 0.070    |
| IM                           | 32/512           | 6.3%     | 1.068 (0.657-1.734) | 0.791    | 50/530           | 9.4%     | 1.356 (0.897-2.047) | 0.148    | 76/554           | 13.7%    | 1.318 (0.938-1.852) | 0.111    |
| NM                           | 51/808           | 6.3%     | -                   | -        | 64/821           | 7.8%     | -                   | -        | 97/850           | 11.4%    | -                   | -        |
| FM                           | 28/655           | 4.3%     | 0.653 (0.397-1.073) | 0.093    | 40/667           | 6.0%     | 0.773 (0.503-1.189) | 0.241    | 67/691           | 9.7%     | 0.838 (0.593-1.184) | 0.316    |
| <b>Sertraline</b>            |                  |          |                     |          |                  |          |                     |          |                  |          |                     |          |
| <b>Metaboliser phenotype</b> | <b>30 days</b>   |          |                     |          | <b>60 days</b>   |          |                     |          | <b>90 days</b>   |          |                     |          |
|                              | Switch frequency | % switch | OR (95% CI)         | <i>P</i> | Switch frequency | % switch | OR (95% CI)         | <i>P</i> | Switch frequency | % switch | OR (95% CI)         | <i>P</i> |
| PM                           | 16/188           | 8.5%     | 1.132 (0.660-1.943) | 0.652    | 20/192           | 10.4%    | 1.161 (0.713-1.892) | 0.548    | 29/200           | 14.5%    | 1.125 (0.744-1.702) | 0.575    |
| IM                           | 151/1933         | 7.8%     | 1.068 (0.858-1.33)  | 0.557    | 187/1969         | 9.5%     | 1.09 (0.893-1.331)  | 0.397    | 284/2048         | 13.9%    | 1.071 (0.908-1.263) | 0.415    |
| NM                           | 223/2993         | 7.5%     | -                   | -        | 269/3039         | 8.9%     | -                   | -        | 416/3165         | 13.1%    | -                   | -        |
| FM                           | 182/2279         | 8.0%     | 1.087 (0.883-1.337) | 0.432    | 233/2330         | 10.0%    | 1.149 (0.953-1.386) | 0.146    | 352/2438         | 14.4%    | 1.127 (0.965-1.317) | 0.131    |

**Supplementary Table S5:** Associations between CYP2C19 metaboliser phenotype and antidepressant discontinuation in a subset of individuals that exhibited a broad depression phenotype.

| <b>Citalopram</b>            |                                                  |               |                     |          |                                                        |               |                     |          |
|------------------------------|--------------------------------------------------|---------------|---------------------|----------|--------------------------------------------------------|---------------|---------------------|----------|
| <b>Metaboliser phenotype</b> | <b>Discontinuation after single prescription</b> |               |                     |          | <b>Discontinuation after brief prescription period</b> |               |                     |          |
|                              | Discontinue frequency                            | % discontinue | OR (95% CI)         | <i>P</i> | Discontinue frequency                                  | % discontinue | OR (95% CI)         | <i>P</i> |
| PM                           | 49/405                                           | 12.1%         | 1.446 (1.054-1.983) | 0.022    | 62/415                                                 | 14.9%         | 1.426 (1.073-1.896) | 0.015    |
| IM                           | 351/4009                                         | 8.8%          | 1.009 (0.875-1.163) | 0.905    | 482/4118                                               | 11.7%         | 1.056 (0.933-1.196) | 0.389    |
| NM                           | 537/6170                                         | 8.7%          | -                   | -        | 704/6314                                               | 11.1%         | -                   | -        |
| FM                           | 382/4917                                         | 7.8%          | 0.890 (0.775-1.022) | 0.097    | 514/5027                                               | 10.2%         | 0.916 (0.811-1.034) | 0.157    |
| <b>Escitalopram</b>          |                                                  |               |                     |          |                                                        |               |                     |          |
| <b>Metaboliser phenotype</b> | <b>Discontinuation after single prescription</b> |               |                     |          | <b>Discontinuation after brief prescription period</b> |               |                     |          |
|                              | Discontinue frequency                            | % discontinue | OR (95% CI)         | <i>P</i> | Discontinue frequency                                  | % discontinue | OR (95% CI)         | <i>P</i> |
| PM                           | 1/44                                             | 2.3%          | 0.288 (0.037-2.245) | 0.235    | 4/46                                                   | 8.7%          | 0.838 (0.272-2.584) | 0.758    |
| IM                           | 24/504                                           | 4.8%          | 0.634 (0.380-1.057) | 0.081    | 35/512                                                 | 6.8%          | 0.692 (0.449-1.068) | 0.096    |
| NM                           | 59/816                                           | 7.2%          | -                   | -        | 80/834                                                 | 9.6%          | -                   | -        |
| FM                           | 31/658                                           | 4.7%          | 0.612 (0.383-0.979) | 0.041    | 46/672                                                 | 6.8%          | 0.655 (0.441-0.973) | 0.036    |
| <b>Sertraline</b>            |                                                  |               |                     |          |                                                        |               |                     |          |
| <b>Metaboliser phenotype</b> | <b>Discontinuation after single prescription</b> |               |                     |          | <b>Discontinuation after brief prescription period</b> |               |                     |          |
|                              | Discontinue frequency                            | % discontinue | OR (95% CI)         | <i>P</i> | Discontinue frequency                                  | % discontinue | OR (95% CI)         | <i>P</i> |
| PM                           | 17/189                                           | 9.0%          | 1.099 (0.649-1.858) | 0.726    | 23/194                                                 | 11.9%         | 1.026 (0.648-1.624) | 0.914    |
| IM                           | 188/1970                                         | 9.5%          | 1.085 (0.889-1.324) | 0.424    | 236/2016                                               | 11.7%         | 0.963 (0.808-1.149) | 0.678    |
| NM                           | 272/3042                                         | 8.9%          | -                   | -        | 384/3143                                               | 12.2%         | -                   | -        |
| FM                           | 197/2294                                         | 8.6%          | 0.956 (0.786-1.163) | 0.652    | 271/2360                                               | 11.5%         | 0.924 (0.780-1.094) | 0.359    |

**Supplementary Table S6:** Associations between CYP2C19 metaboliser phenotype and antidepressant duration in a subset of individuals that exhibited a broad depression phenotype.

| <b>Citalopram</b>            |                               |                |          |                               |                |          |
|------------------------------|-------------------------------|----------------|----------|-------------------------------|----------------|----------|
| <b>Metaboliser phenotype</b> | <b>Count-based definition</b> |                |          | <b>Weeks-based definition</b> |                |          |
|                              | Mean (SD)                     | $\beta$ (SE)   | <i>P</i> | Mean (SD)                     | $\beta$ (SE)   | <i>P</i> |
| Poor metaboliser             | 23.2 (34.8)                   | -0.078 (0.069) | 0.258    | 112.5 (157.5)                 | -0.076 (0.073) | 0.3      |
| Intermediate metaboliser     | 23.5 (35.8)                   | -0.055 (0.027) | 0.043    | 109.2 (152.1)                 | -0.056 (0.029) | 0.05     |
| Normal metaboliser           | 24.4 (36.1)                   | -              | -        | 113.3 (152.7)                 | -              | -        |
| Fast metaboliser             | 24.1 (35.3)                   | -0.009 (0.026) | 0.733    | 112.3 (151.3)                 | -0.004 (0.027) | 0.883    |
| <b>Escitalopram</b>          |                               |                |          |                               |                |          |
| <b>Metaboliser phenotype</b> | <b>Count-based definition</b> |                |          | <b>Weeks-based definition</b> |                |          |
|                              | Mean (SD)                     | $\beta$ (SE)   | <i>P</i> | Mean (SD)                     | $\beta$ (SE)   | <i>P</i> |
| Poor metaboliser             | 11.2 (18.4)                   | -0.377 (0.185) | 0.042    | 57.6 (94.6)                   | -0.401 (0.197) | 0.042    |
| Intermediate metaboliser     | 18.2 (29.4)                   | -0.079 (0.071) | 0.262    | 87.1 (134.1)                  | -0.087 (0.075) | 0.245    |
| Normal metaboliser           | 19.7 (37.6)                   | -              | -        | 93.1 (138.1)                  | -              | -        |
| Fast metaboliser             | 20.4 (33.2)                   | 0.074 (0.067)  | 0.273    | 95.1 (141.6)                  | 0.061 (0.071)  | 0.396    |
| <b>Sertraline</b>            |                               |                |          |                               |                |          |
| <b>Metaboliser phenotype</b> | <b>Count-based definition</b> |                |          | <b>Weeks-based definition</b> |                |          |
|                              | Mean (SD)                     | $\beta$ (SE)   | <i>P</i> | Mean (SD)                     | $\beta$ (SE)   | <i>P</i> |
| Poor metaboliser             | 21.7 (39.6)                   | -0.077 (0.095) | 0.419    | 94.8 (151.2)                  | -0.102 (0.099) | 0.301    |
| Intermediate metaboliser     | 20.3 (35.8)                   | -0.072 (0.037) | 0.055    | 90.6 (149.0)                  | -0.078 (0.039) | 0.044    |
| Normal metaboliser           | 21.5 (40.6)                   | -              | -        | 95.3 (153.5)                  | -              | -        |
| Fast metaboliser             | 19.6 (34.6)                   | -0.071 (0.036) | 0.045    | 86.9 (140.3)                  | -0.082 (0.037) | 0.026    |

**Supplementary Table S7:** Associations between CYP2C19 metaboliser phenotype and side effects following initial antidepressant prescription in a subset of individuals that exhibited a broad depression phenotype.

| <b>Citalopram</b>            |                                    |                |                     |          |                                    |                |                     |          |
|------------------------------|------------------------------------|----------------|---------------------|----------|------------------------------------|----------------|---------------------|----------|
| <b>Metaboliser phenotype</b> | <b>Side effects within 30 days</b> |                |                     |          | <b>Side effects within 60 days</b> |                |                     |          |
|                              | Side effects frequency             | % side effects | OR (95% CI)         | <i>P</i> | Side effects frequency             | % side effects | OR (95% CI)         | <i>P</i> |
| PM                           | 26/501                             | 5.2%           | 0.888 (0.59-1.335)  | 0.567    | 38/501                             | 7.6%           | 0.828 (0.588-1.165) | 0.278    |
| IM                           | 284/5058                           | 5.6%           | 0.967 (0.829-1.129) | 0.673    | 441/5058                           | 8.7%           | 0.97 (0.855-1.101)  | 0.639    |
| NM                           | 444/7685                           | 5.8%           | -                   | -        | 686/7685                           | 8.9%           | -                   | -        |
| FM                           | 327/6138                           | 5.3%           | 0.913 (0.788-1.059) | 0.229    | 489/6138                           | 8.0%           | 0.881 (0.780-0.995) | 0.041    |
| <b>Esitalopram</b>           |                                    |                |                     |          |                                    |                |                     |          |
| <b>Metaboliser phenotype</b> | <b>Side effects within 30 days</b> |                |                     |          | <b>Side effects within 60 days</b> |                |                     |          |
|                              | Discontinue frequency              | % discontinue  | OR (95% CI)         | <i>P</i> | Discontinue frequency              | % discontinue  | OR (95% CI)         | <i>P</i> |
| PM                           | 5/66                               | 7.6%           | 1.737 (0.629-4.798) | 0.287    | 6/66                               | 9.1%           | 1.033 (0.415-2.57)  | 0.945    |
| IM                           | 43/696                             | 6.2%           | 1.342 (0.875-2.059) | 0.177    | 65/696                             | 9.3%           | 1.058 (0.751-1.49)  | 0.748    |
| NM                           | 55/1077                            | 5.1%           | -                   | -        | 99/1077                            | 9.2%           | -                   | -        |
| FM                           | 45/841                             | 5.4%           | 1.063 (0.698-1.619) | 0.775    | 70/841                             | 8.3%           | 0.863 (0.618-1.204) | 0.386    |
| <b>Sertraline</b>            |                                    |                |                     |          |                                    |                |                     |          |
| <b>Metaboliser phenotype</b> | <b>Side effects within 30 days</b> |                |                     |          | <b>Side effects within 60 days</b> |                |                     |          |
|                              | Discontinue frequency              | % discontinue  | OR (95% CI)         | <i>P</i> | Discontinue frequency              | % discontinue  | OR (95% CI)         | <i>P</i> |
| PM                           | 12/260                             | 4.6%           | 0.893 (0.488-1.633) | 0.713    | 20/260                             | 7.7%           | 0.875 (0.544-1.407) | 0.581    |
| IM                           | 144/2595                           | 5.5%           | 1.067 (0.854-1.332) | 0.569    | 238/2595                           | 9.2%           | 1.033 (0.867-1.23)  | 0.715    |
| NM                           | 205/3942                           | 5.2%           | -                   | -        | 352/3942                           | 8.9%           | -                   | -        |
| FM                           | 150/3075                           | 4.9%           | 0.944 (0.758-1.174) | 0.603    | 257/3075                           | 8.4%           | 0.938 (0.791-1.112) | 0.461    |

**Supplementary Table S8:** Associations between CYP2C19 activity score and antidepressant switching.

| Antidepressant switching at 3 timepoints |               |          |                |          |                |          |
|------------------------------------------|---------------|----------|----------------|----------|----------------|----------|
| SSRI                                     | 30 days       |          | 60 days        |          | 90 days        |          |
|                                          | B (SE)        | <i>P</i> | B (SE)         | <i>P</i> | B (SE)         | <i>P</i> |
| Citalopram                               | 0.054 (0.04)  | 0.172    | 0.027 (0.036)  | 0.454    | 0.009 (0.029)  | 0.763    |
| Escitalopram                             | -0.311 (0.11) | 0.005    | -0.337 (0.096) | <0.001   | -0.249 (0.079) | 0.002    |
| Sertraline                               | 0.027 (0.046) | 0.559    | 0.039 (0.041)  | 0.34     | 0.041 (0.035)  | 0.235    |

**Supplementary Table S9:** Associations between CYP2C19 activity score and antidepressant discontinuation.

| Antidepressant discontinuation |                                           |          |                                                 |          |
|--------------------------------|-------------------------------------------|----------|-------------------------------------------------|----------|
| SSRI                           | Discontinuation after single prescription |          | Discontinuation after brief prescription period |          |
|                                | B (SE)                                    | <i>P</i> | B (SE)                                          | <i>P</i> |
| Citalopram                     | -0.041 (0.026)                            | 0.114    | -0.051 (0.023)                                  | 0.029    |
| Escitalopram                   | 0.003 (0.098)                             | 0.972    | -0.064 (0.083)                                  | 0.446    |
| Sertraline                     | -0.009 (0.038)                            | 0.821    | -0.006 (0.033)                                  | 0.846    |



**Supplementary Table S10:** Associations between CYP2C19 activity score and antidepressant duration.

| Antidepressant duration |                        |          |                        |          |
|-------------------------|------------------------|----------|------------------------|----------|
| SSRI                    | Count-based definition |          | Weeks-based definition |          |
|                         | B (SE)                 | <i>P</i> | B (SE)                 | <i>P</i> |
| Citalopram              | 0.009 (0.011)          | 0.397    | 0.010 (0.012)          | 0.385    |
| Escitalopram            | 0.072 (0.031)          | 0.021    | 0.068 (0.031)          | 0.030    |
| Sertraline              | 0.071 (0.033)          | 0.033    | 0.067 (0.033)          | 0.044    |

**Supplementary Table S11:** Associations between CYP2C19 activity score and side effects following initial antidepressant prescription.

| Side effects following initial antidepressant prescription within 3 timepoints |                |          |                |          |                |          |
|--------------------------------------------------------------------------------|----------------|----------|----------------|----------|----------------|----------|
| SSRI                                                                           | 30 days        |          | 60 days        |          | 90 days        |          |
|                                                                                | B (SE)         | <i>P</i> | B (SE)         | <i>P</i> | B (SE)         | <i>P</i> |
| Citalopram                                                                     | -0.001 (0.033) | 0.974    | -0.015 (0.027) | 0.58     | -0.018 (0.024) | 0.465    |
| Escitalopram                                                                   | -0.194 (0.100) | 0.052    | -0.170 (0.079) | 0.032    | -0.157 (0.070) | 0.026    |
| Sertraline                                                                     | -0.043 (0.047) | 0.364    | -0.049 (0.037) | 0.186    | -0.046 (0.033) | 0.172    |

**Supplementary Table S12:** Full list of read v2 and CTV3 clinical event codes pertinent to side effects for psychotropic drugs, based on the UKU side effect rating scale (UKU-SERS).

| UKU-SERS Item                               | Corresponding read v2 and CTV3 codes                                                                                                                                                                                                                                                                                                                                                                                                                                                                                                                                                                                                                                                                                                                                                                                                                                                                                         |
|---------------------------------------------|------------------------------------------------------------------------------------------------------------------------------------------------------------------------------------------------------------------------------------------------------------------------------------------------------------------------------------------------------------------------------------------------------------------------------------------------------------------------------------------------------------------------------------------------------------------------------------------------------------------------------------------------------------------------------------------------------------------------------------------------------------------------------------------------------------------------------------------------------------------------------------------------------------------------------|
| Concentration difficulties                  | 1BR.; 1BR0.; 1BW.; 8B39C; Ua1XX; X760c; X760d; .1BR.; .1BR0; .1BW.                                                                                                                                                                                                                                                                                                                                                                                                                                                                                                                                                                                                                                                                                                                                                                                                                                                           |
| Asthenia/Lassitude/ Increased Fatiguability | Eu460; R0072; R007z; 168.; 1682; R007.; R0071; 1683; 168Z.; E205.; R0075; E2622; Eu453; XM0yx; XM1AV; .E36.; XE0uN; XM06l; XM0D3; .168.; .1682; .R07.; .R071; .R07Z; XM06o; .1683; .168Z                                                                                                                                                                                                                                                                                                                                                                                                                                                                                                                                                                                                                                                                                                                                     |
| Sleepiness/sedation                         | R0053; R00z4; X007z; X0080; X0082; X76AR; XE2nU; XM06R; Xa2bY; .R053; XM0yz; X769V                                                                                                                                                                                                                                                                                                                                                                                                                                                                                                                                                                                                                                                                                                                                                                                                                                           |
| Failing memory                              | 1B1a.; 1B1A.; 1B1A0; 1B1A1; 1B1Y; 1S21.; 1S23.; 3A10.; 3A20.; 3A30.; 3A40.; 3A50.; 3A60.; 3A70.; 3A80.; 3A91.; 3AA1.; 3AG1.; E2A10; R00z0; 28E.; 28E0.; 28E1.; 28E2.; 28E3.; 3AE1.; 3AE2.; 3AE3.; 3AE4.; 3AE5.; 3AE6.; Eu057; Ua196; Ua197; X75xC; X75xD; X75xG; X75xH; X75xU; X75xY; XE1bq; Xa2Ve; XaB5o; Ua189; X00RS; XaJBS; XaJBT; XaJBU; XaJBV; XaJBW; XaJBX; Xaagi; Xaagj; XaJfj; .1B1A; .1B1Y; .1B1a; .1S21; .3A10; .3A20; .3A30; .3A40; .3A50; .3A60; .3A70; .3A80; .3A91; .3AA1; .E4J3; .R0Z0; Xaagk; .28E.; .3AE1; .3AE2; .3AE3; .3AE4; .3AE5; .3AE6; .49B4; .E16.                                                                                                                                                                                                                                                                                                                                                 |
| Depression                                  | 1B17.; 1B1U.; 1BT.; 2257.; E02y3; E112.; E1120; E1121; E1122; E1123; E1124; E112z; E113.; E1130; E1131; E1132; E1133; E1134; E1137; E113z; E11y2; E11z2; E135.; E130.; Eu32.; Eu320; Eu321; Eu322; Eu323; Eu324; Eu325; Eu326; Eu327; Eu328; Eu329; Eu32A; Eu32y; Eu32z; Eu33.; Eu330; Eu331; Eu332; Eu333; Eu33y; Eu33z; Eu3z.; E1150; E1151; E1152; E1153; E1154; E1155; E1156; E115z; E11y0; E2003; Eu412; Eu3y1; E11.; E1125; E1126; E1135; E1136; E114.; E115.; E11y.; E11y3; E11yz; Eu313; Eu314; X00SM; X00SO; X00SQ; X00SR; X00SU; X00Sb; XE0re; XE0uv; XE1Y0; XE1Y1; XE1ZY; XE1ZZ; XE1Za; XE1Zb; XE1Zc; XE1Zd; XE1Ze; XE1Zf; XE1aQ; XE1aS; XM0CR; XM1GC; XSEGJ; XSGok; XSGol; XSGom; XSGon; Xa0wV; XaB95; XaB9J; XaCHo; XaCHr; XaCHs; XaCIs; XaCIt; XaClu; XaImU; .1B17; .1B1U; .1BT.; .2257; .E22.; .E221; .E22Z; .E478; .E4J5; .E4J6; .E4J7; .E4J8; .E4J9; .E4JC; Eu204; Eu251; Eu31.; Eu315; Eu341; X00SH; Xa0Rd |
| Tension/Inner unrest                        | 1B14.; 1B12.; R2y2.; 1B1O.; R00zD; 1B16.; 2256.; XC0CP; .1B14; .1B12; XE0ra; .RJ2.; XM1Af; .1B1O; Ua15v; XE0rd; .1B16; .2256                                                                                                                                                                                                                                                                                                                                                                                                                                                                                                                                                                                                                                                                                                                                                                                                 |
| Increased duration of sleep                 | 1BX1.; 1B1Q.; R0056; R0057; X007w; X0080; X76AQ; .1BX1; .1B1Q; X76AE; XaFqr; XM06j                                                                                                                                                                                                                                                                                                                                                                                                                                                                                                                                                                                                                                                                                                                                                                                                                                           |
| Reduced duration of sleep                   | 1B1B.; 1B1Q.; E274D; R005.; R0051; E274.; E274E.; E274B.; R0058; R0059; R005z; R0056; R0057; E274B; E274E; X007v; X76AG; X76AN; XE0ux; XE1Yi; XE2Pv; XE2cd; XM06i; Xa7wV; .1B1B; .R05.; .R05Z; XM06j; XaFqr; .1B1Q; R0056.; X76AE                                                                                                                                                                                                                                                                                                                                                                                                                                                                                                                                                                                                                                                                                            |

|                           |                                                                                                                                                                                                                                                                                                                                                                                                               |
|---------------------------|---------------------------------------------------------------------------------------------------------------------------------------------------------------------------------------------------------------------------------------------------------------------------------------------------------------------------------------------------------------------------------------------------------------|
| Increased dream activity  | 1BX4.; 1BX5.; 1BX6.; 1BX7.; 1BX8.; E274y; Ua1ZR; X764A; X764B; X764C; XaKSR; XaKSS; XaKST; XaKSU; XaKSV; .1BX4; .1BX5; .1BX6; .1BX7; .1BX8                                                                                                                                                                                                                                                                    |
| Emotional indifference    | 2254.; R00z7; XE1ik; XM013; .2254; X760R; X80ws; Xa3HP; Ua1r0; Ua1r1                                                                                                                                                                                                                                                                                                                                          |
| Dystonia                  | 7Q040; F136.; F1372; F138.; F138z; F13A.; F13B.; F13X.; Fyu24; Fyu2A; Ub1TW; X0049; X004F; X004G; X004H; X004I; X004M; X004N; X004Q; X004R; X004T; X004X; X76qI; XaMEg; XaNms; .F235; F13C.                                                                                                                                                                                                                   |
| Rigidity                  | 1B35.; 25F.; 25F2.; 25FZ.; 294.; 2943.; 2944.; R094.; 2942.; X76gL; X76qN; XM03C; XM03z; XM040; XM098; XM1Wv; XaJgO; .25F.; .25F2; .25FZ; .294.; .2943; .2944; F13z3; .R94.; .M683; XaE6P; .1B35; XE1hV; XE1jG; X76qO                                                                                                                                                                                         |
| Hypokinesia/akinesia      | F13z3; 1P01.; 1P03.; .1P01; .1P03; X763E                                                                                                                                                                                                                                                                                                                                                                      |
| Hyperkinesia              | E2E1.; E2E2.; E2Ey.; E2Ez.; Eu90.; Eu90y; Eu90z; J105.; J65yB; F1381; R013.; E2E.; X004Z; X004a; X004b; X004c; X78x7; XE0aN; XE15N; XE17n; .E4H.; .F234                                                                                                                                                                                                                                                       |
| Tremor                    | 1B22.; 2975.; 2976.; 2977.; 297B.; 297C.; E2013; F1312; Fyu25; R0103; 1B23.; X004l; X004m; X004n; X004o; X004p; X76ns; X76nt; X76nv; XE0rn; XE1jk; XM047; XM048; XM0z1; XaKV5; XaKV6; .1B22; .2975; .2976; .2977; .R103; XE0ro; XM1F4; .1B23                                                                                                                                                                  |
| Akathisia                 | 1P04.; X004d; Xa306; XaKVg; .1P04; .F369                                                                                                                                                                                                                                                                                                                                                                      |
| Epileptic seizures        | 282.; F2516; F25H.; R0034; R003z; F25C.; F253.; F25X.; F25z.; Fyu50; Fyu59; X006M; X75YS; X75Z0; XM03h; XM06d; Xa0Ji; XaBM2; XaEHZ; XaElj; XaREJ; .282.; .R03Z; F2510; Fyu52; X006t; X007B; .F342; .F343; .F347                                                                                                                                                                                               |
| Paraesthesia              | 1B46.; 1B47.; 29B5.; 29B50; F351.; G73y4; G73y5; G73y6; R0207; 1B43.; R0203; 1B44.; 1B442; R0206; 2G2D.; 1B42.; R0202; R0201; X205S; XM07I; Xa0We; XaBj9; XaBjA; XaBtl; XaCIS; XaINq; .1B46; .1B47; .29B5; .F441; .R207; X78xq; XE0v1; XM1BF; .1B43; .R203; XE0v3; XM07H; Xa4XI; Xa6mx; Xa71Y; Xa7QR; XaBtR; XaBtg; XaBth; XaBti; XaBtj; XaBu3; XaCIy; .1B44; .R206; XM1BB; Xa485; .R201; XE0uz; .1B42; .R202 |
| Accommodation disturbance | 2BI6.; F47.; F475.; F4750; F4752; F475z; F47y.; F47yz; F47z.; FyuK.; F4816; X00fN; X00fO; X00fP; X00gD; X77OP; X77OQ; XE18t; .2BI6; .F56.; .F565; .F56Z; X78x2                                                                                                                                                                                                                                                |
| Increased salivation      | 1925.; 2532.; R124.; XE0r6; XM1Mv; .1925; .2532                                                                                                                                                                                                                                                                                                                                                               |
| Reduced salivation        | J077.; J0770; J077z; 1927.; Ryu78; X76bF; Xa7TC; Xa7TE; X76bE; .1927                                                                                                                                                                                                                                                                                                                                          |
| Nausea/vomiting           | 198.; 1982.; 198Z.; R070.; R0700; R070z; R0701; R0703; 199.; 1992.; 1993.; 199Z.; 19FZ.; 19G.; J162.; X75qw; Xa1pJ; Xa7ee; .198.; .1982; .198Z; .R70.; .R700; .R70Z; XM0Cl; X76co; XE0rA; XM0Cm; XaBMW; .199.; .1992; .1993; .199Z; .R701; R0704; .19FZ; .19G.                                                                                                                                                |
| Diarrohea                 | 19F.; 19F2.; 19F3.; J4...; J4z...; E2643; 19G...; 4743.; 4744.; 19EE.; 2AF3.; J432.; J4zz.; J5201; X30Bp; X76dE; XE0rN; XE0rO; XM1Mz; .19F.; .19F2; .19F3; .19G.; J525.; .4743;                                                                                                                                                                                                                               |

|                                |                                                                                                                                                                                                                                                                                                                                                                                                                                                                                 |
|--------------------------------|---------------------------------------------------------------------------------------------------------------------------------------------------------------------------------------------------------------------------------------------------------------------------------------------------------------------------------------------------------------------------------------------------------------------------------------------------------------------------------|
|                                | .4744; Xa7VE; .19EE; .2AF3; X30Bq                                                                                                                                                                                                                                                                                                                                                                                                                                               |
| Constipation                   | 19C.; 19C2.; E2645; J520.; J5200; J5203; J520z; J520y; J50zz; J52y1; 2AF2.; X30Bm; XE0cn; XE0rD; Xa7n2; XaE1r; .19C.; .19C2; .2AF2; .I63.; X305B; Xa1hS; Xa1hT; .I61.; .4745; 4745; Xa7VB                                                                                                                                                                                                                                                                                       |
| Micturition disturbances       | 1A33.; 1A34.; 1AZ3.; R086.; Ryu40; 1A32.; R082.; R0822; R0823; R0824; R0860; R0863; .1A33; .1A34; .1AZ3; .R86.; 1AC0.; 1AC1.; Ua1sm; X76Xb; X76Xp; X76Xt; X76Xx; X76Xz; XE0rS; .1A32; .1AC1; XaD2w; .R82.; .R820; .R821; .R822; X30O4                                                                                                                                                                                                                                           |
| Polyuria/polydipsia            | 1A1.; 1A12.; 1A1Z.; 1A25.; R084.; R0840; R084z; R0862; 1A26.; 1A27.; 1AC2.; R0841; 1644.; 1645.; R035.; R035z; R0350; .1A1.; .1A12; .1A1Z; .1A25; .1A35; .R84.; .R84Z; 1A35.; X76Xs; X76XV; XE0rQ; XE2RD; XM1CC; .1A27; .1AC2; X30OG; X76Xr; Xa7Wt; XaNfC; .R840; XE0qd; .1644; .R33.; .R33Z; X76cR; .R330                                                                                                                                                                      |
| Orthostatic dizziness          | G870.; 1B55.; 1B5.; 1B53.; R0040; X00CT; XaNXF; .G971; XaJDf; .1B55; XC07f; XE0v5; XM06f; XM06g; .1B5.; .1B53; .R040                                                                                                                                                                                                                                                                                                                                                            |
| Palpitations                   | 181.; 1812.; 181Z.; R051.; R051z; 1814.; 1813.; X76Jb; X76Je; X76Jo; XE0qv; .181.; .1812; .1813; .1814; .181Z; .R51.; .R51Z                                                                                                                                                                                                                                                                                                                                                     |
| Increased tendency to sweating | 166.; 1662.; 2223.; R0081; R0084; R008.; R0082; R0083; R008z; 166Z.; X76A3; X76A4; X76A5; XE0qg; XM06r; Xa7ls; .166.; .1662; .166Z; .2223; XM1BD; XaDml; .R08.; .R08Z                                                                                                                                                                                                                                                                                                           |
| Rash                           | 1D14.; 2227.; 2I14.; M130.; R021.; R021z; 2536.; 2FR.; 2FU.; 2FW0.; 2I1B.; 2I1C.; M2y42; M28.; M280.; M281.; M28z.; Myu4.; 2F23.; 2FS.; R0270; R0210; M28y.; X50Ge; X75uU; X75uX; XE0vP; XE1gz; XM07J; XM07T; XM1YL; Xa7yK; Xa9wq; XaB3a; XaBsZ; XaEEr; XaIO6; XaIq5; XaIwz; XaIx0; .1D14; .2227; .2FR.; .2FS.; .2FU.; .2FW0; .2I14; .2I1B; .2I1C; .L49.; .R21.; .R212; .R21Z; XE2cX; XM11k; .2F23; .R270; X508N; XE1BT; XE1D0; XE1tH; Xa8EW; .L491; .L49Z; .P9G2; X50C5; .R210 |
| Pruritus                       | M180.; M18.; Myu2D; 1D15.; M18z.; Myu2B; XE1B7; XE1BA; XE1CY; Xa0Wb; XM00q; Xa05c; Xa13L; .L351; .L35.; .L35Z; XE0sH; .1D15; XM1Xn                                                                                                                                                                                                                                                                                                                                              |
| Photosensitivity               | M1274; F25F.; M1273; X504r; X505T; X50Gr; XE1CC; .L247; X006y; X75b9                                                                                                                                                                                                                                                                                                                                                                                                            |
| Increased pigmentation         | 2275.; M292.; 2FM1.; X75tt; XE1D2; Xa6mT; .L4A.; .L4A3; XaIuv; .2FM1                                                                                                                                                                                                                                                                                                                                                                                                            |
| Weight gain                    | 1622.; 1624.; 1629.; R031.; Ua16s; X76C9; X90kO; Xaazc; .1622; .1624; .R301                                                                                                                                                                                                                                                                                                                                                                                                     |
| Weight loss                    | 1623.; 1625.; 1627.; 1D1A.; R032.; 22A8.; X76CA; X90kN; XE0qb; XE0uH; XaBmk; XaIxC; XaKwR; XaQgK; XaXTs; .1623; .1625; .1D1A; .22A8; .R302                                                                                                                                                                                                                                                                                                                                      |
| Menorrhagia                    | K5920; K593.; K5A0.; K5A6.; K598.; K592.; K5921; K596.; X408g; X408h; XE0ew; XE0h5; Xa9CP; XaFC2; .J72.; .J771; X408j; XE0eo; XE0gt; .J743; XE0er; XE0h1; .J75.                                                                                                                                                                                                                                                                                                                 |

|                          |                                                                                                                                                                                                                                                                                                                                                                                                                                                       |
|--------------------------|-------------------------------------------------------------------------------------------------------------------------------------------------------------------------------------------------------------------------------------------------------------------------------------------------------------------------------------------------------------------------------------------------------------------------------------------------------|
| Amenorrhea               | K590.; K5901; K590z; K5911; K5913; K5910; X408Z; XE0em; .J71.; .J712; .J71Z; XE0gp; XE0gr; .J741; .J742                                                                                                                                                                                                                                                                                                                                               |
| Galactorrhoea            | K316.; 26D3.; X40Nd; XM0B1; .J4Z3; .26D3                                                                                                                                                                                                                                                                                                                                                                                                              |
| Gynaecomastia            | 26B2.; K3110; K3112; K311.; K311z; X40Ff; XE0eN; XE0g5; XaNz7; XaYQT; .26B2; .J4Z1                                                                                                                                                                                                                                                                                                                                                                    |
| Increased sexual desire  | Eu52.; Eu527; Eu52z; ZV417; E22y5; E22y6; Ua1b5; X76M4; XE1Zu; X00T2; X766y                                                                                                                                                                                                                                                                                                                                                                           |
| Diminished sexual desire | 1ABG.; E2271; Eu520; Eu521; E227.; E2270; E227z; Eu52.; Eu527; Eu52y; Eu52z; ZV417; Eu522; X76M2; X76M3; XE1YO; XE1YP; XE2bA; X00T2; X766x; XE1as; XaBj1; .E422; X76Ly; .1ABG                                                                                                                                                                                                                                                                         |
| Erectile dysfunction     | 1D1B.; E2273; Eu522; 1ABB.; 1ABC.; Eu52.; Eu52z; ZV417; X76ME; X76MM; X76MO; Xa044; XaXgw; .1ABB; .1ABC; .J3ZB; X00T2                                                                                                                                                                                                                                                                                                                                 |
| Ejaculatory Dysfunction  | E2276; Eu524; Eu52.; Eu52z; ZV417; X30OT; X76MS; X76MU; XE1as; gm...; .E422; X76MX; X00T2                                                                                                                                                                                                                                                                                                                                                             |
| Orgastic Dysfunction     | E2274; E2275; Eu523; E2272; Eu520; Eu52.; Eu52y; Eu52z; ZV417; E2276; X401t; X76MU; X76Ma; X76Mb; X76Me; X76Mf; X76Mg; X76Mh; X76Mi; XE1Zt; Eu524; XE1as; .E422; X00T2                                                                                                                                                                                                                                                                                |
| Dry Vagina               | 1AD.; K5A30; K5A3.; K5A5.; X407z; X76M5; .1AD.; Xa6Yg                                                                                                                                                                                                                                                                                                                                                                                                 |
| Headache                 | 1B1G.; 1B1G0; 1BA2.; 1BA3.; 1BA4.; 1BA5.; 1BA6.; 1BA7.; 1BA8.; 1BA9.; 1BAZ.; 1BB1.; 1BB2.; 1BB3.; 1BB4.; 1BBZ.; E2781; F2611; F2620; F2626; F2629; F262A; F2W.; F2W0.; F2X.; Fyu54; Fyu5A; Fyu5B; R040.; F262E; X007I; X007U; X007W; X007b; X007h; XE0rh; XE0s6; XE187; XE1Yl; XM0CV; XaMIU; XaXpZ; XaXsF; .1B1G; .1BA2; .1BA3; .1BA4; .1BA5; .1BA6; .1BA7; .1BA8; .1BA9; .1BB1; .1BB2; .1BB3; .1BBZ; .E4C1; .F35Z; .F39.; .R40.; F2621; F2625; XaXsc |
| Physical Dependence      | E24.; E241.; E2410; E241z; E247.; E2470; E247z; E24z.; 13cG.; 13cQ.; 13cR.; 13cS.; X00Rt; X00S4; XE1YS; XE1YW; .E44.; .E44Z; Ub0nr; Ub0ns; Ub0nt; .13cG; .13cR                                                                                                                                                                                                                                                                                        |
| Psychic Dependence       | 13cS.; 13cQ.; Ub0ns; Ub0nu; .13cQ; .13cS                                                                                                                                                                                                                                                                                                                                                                                                              |

**Supplementary Table S13:** Calculation of CYP2C19 activity score based on all star alleles called in this dataset.

| Allele                   | Score |
|--------------------------|-------|
| *1, *11, *13, *15        | 1     |
| *2, *3, *4, *8, *22, *35 | 0     |
| *9, *10                  | 0.5   |
| *17                      | 2     |
| *30, *34                 | N/A   |
